# Supplementary material
Source: PubMed Central journal article supplement (PMC7267209)
Supplement: AEM.02957-19-s0001.pdf [file AEM.02957-19-s0001.pdf]

## Supplemental materials

**Table S1** Sample information, sequence abundance, and bacterial diversity of the reproductive organs and bacteriomes of both sexes, and the salivary glands and digestive organs of *Pycna repanda* males

| Tissues                | Samples | Effective Tags | OTUs | Richness indices |        | Diversity indices |         |
|------------------------|---------|----------------|------|------------------|--------|-------------------|---------|
|                        |         |                |      | Chao 1           | ACE    | Shannon           | Simpson |
| Male's salivary glands | SGM 1   | 93471          | 354  | 646.25           | 604.16 | 0.9181            | 0.2039  |
|                        | SGM 2   | 83839          | 364  | 628.27           | 625.85 | 1.7753            | 0.4604  |
|                        | SGM 3   | 74025          | 257  | 425.17           | 409.44 | 1.2432            | 0.3089  |
|                        | SGM 4   | 74529          | 212  | 298.06           | 296.67 | 0.7759            | 0.2280  |
| Male's filter chamber  | FCM 1   | 84216          | 418  | 632.44           | 665.01 | 1.2377            | 0.2782  |
|                        | FCM 2   | 85398          | 277  | 434.76           | 422.49 | 1.2993            | 0.3696  |
|                        | FCM 3   | 86855          | 248  | 419.03           | 444.43 | 0.7493            | 0.1738  |
|                        | FCM 4   | 80812          | 234  | 359.08           | 390.42 | 0.9358            | 0.2640  |
| Male's conical segment | CSM 1   | 77644          | 235  | 385.92           | 412.30 | 0.9165            | 0.2093  |
|                        | CSM 2   | 85919          | 245  | 366.87           | 381.28 | 0.8002            | 0.1798  |
|                        | CSM 3   | 79668          | 294  | 432.60           | 410.36 | 1.5108            | 0.3703  |
|                        | CSM 4   | 103034         | 243  | 409.79           | 404.94 | 0.4899            | 0.0984  |
| Male's midgut          | MM 1    | 81107          | 252  | 453.28           | 455.93 | 0.7797            | 0.1543  |
|                        | MM 2    | 85007          | 328  | 524.50           | 552.10 | 1.6130            | 0.3740  |
|                        | MM 3    | 72193          | 209  | 370              | 364.26 | 0.9831            | 0.2310  |
|                        | MM 4    | 92078          | 196  | 292.87           | 315.62 | 0.3405            | 0.0563  |
| Male's hindgut         | HM 1    | 104818         | 349  | 503.41           | 511.58 | 1.4454            | 0.3798  |
|                        | HM 2    | 79333          | 349  | 449.16           | 422.48 | 1.7084            | 0.5277  |
|                        | HM 3    | 82658          | 257  | 447.65           | 472.41 | 0.8856            | 0.2645  |
|                        | HM 4    | 65707          | 221  | 310.76           | 315.66 | 1.6597            | 0.5421  |
| Testes                 | TM 1    | 84440          | 425  | 613.25           | 634.81 | 2.3263            | 0.5660  |
|                        | TM 2    | 81792          | 376  | 638.86           | 624.18 | 1.6014            | 0.3780  |
|                        | TM 3    | 88302          | 339  | 534.03           | 482.70 | 2.2142            | 0.6357  |
|                        | TM 4    | 85489          | 285  | 382              | 394.27 | 1.7336            | 0.4865  |
| Male's bacteriomes     | BM 1    | 70280          | 263  | 388.82           | 370.08 | 1.9265            | 0.5455  |
|                        | BM 2    | 92568          | 347  | 590.89           | 535.82 | 1.5497            | 0.3819  |
|                        | BM 3    | 66345          | 155  | 276.71           | 274.67 | 0.7379            | 0.1789  |
|                        | BM 4    | 91484          | 191  | 262.03           | 294.75 | 0.9585            | 0.2309  |
| Ovaries                | OF 1    | 72703          | 296  | 426              | 419.67 | 2.9963            | 0.7855  |
|                        | OF 2    | 78427          | 220  | 333.75           | 367.70 | 3.1249            | 0.7673  |
|                        | OF 3    | 81942          | 220  | 350.57           | 329.40 | 2.9159            | 0.7603  |
|                        | OF 4    | 81753          | 199  | 295.28           | 324.86 | 2.6241            | 0.7252  |
| Female's bacteriomes   | BF 1    | 73467          | 158  | 282.25           | 261.45 | 0.7997            | 0.2078  |
|                        | BF 2    | 86450          | 203  | 329.40           | 310.47 | 1.5191            | 0.4700  |
|                        | BF 3    | 85002          | 195  | 312.34           | 324.78 | 1.5589            | 0.5473  |
|                        | BF 4    | 82809          | 148  | 214.96           | 219.37 | 1.1042            | 0.3089  |

Abbreviations: SGM, salivary glands of males; FCM, filter chamber of males; CSM, conical segment of males; MM, midgut of males; HM, hindgut of males; TM, testes of males; BM, bacteriomes of males; OF, ovaries of females; BF, bacteriomes of females.

**Table S2** The 16S rRNA gene sequences of dominant symbionts harbored in *Pycna repanda*

| Symbiont types                     | 16S rRNA gene sequences                                                                                                                                                                                                                                                                                                                                                                                                                                                                                                                                                                                                                                                                                                                                                                                                                                                                                                                                                                                                                                                                                                                                                                                                                                                                                                                                                                                                                                                                                                                                                                                                                                                                                                                                                                                                                                                                                                                                                                                                                                                                                                                                                                                                                                                                                                                                                                             |
|------------------------------------|-----------------------------------------------------------------------------------------------------------------------------------------------------------------------------------------------------------------------------------------------------------------------------------------------------------------------------------------------------------------------------------------------------------------------------------------------------------------------------------------------------------------------------------------------------------------------------------------------------------------------------------------------------------------------------------------------------------------------------------------------------------------------------------------------------------------------------------------------------------------------------------------------------------------------------------------------------------------------------------------------------------------------------------------------------------------------------------------------------------------------------------------------------------------------------------------------------------------------------------------------------------------------------------------------------------------------------------------------------------------------------------------------------------------------------------------------------------------------------------------------------------------------------------------------------------------------------------------------------------------------------------------------------------------------------------------------------------------------------------------------------------------------------------------------------------------------------------------------------------------------------------------------------------------------------------------------------------------------------------------------------------------------------------------------------------------------------------------------------------------------------------------------------------------------------------------------------------------------------------------------------------------------------------------------------------------------------------------------------------------------------------------------------|
| Clone PR-16<br>( <i>Sulcia</i> )   | <p>AGAGTTTGATCATGGCTCAGGATAAACGCTAGCGGAGGGCATAACACATGCA<br/> AGTCGAGGGGCATCAAAAAAATATAAGTTTACTTATGTTTTTTGTTTGGCAAC<br/> CGGCGTACGGGTGAGTAATACATACGTAACCTTCCTTATGCTGAAGGATAGCC<br/> CGAGGAACTTGGATTAATACTTCATAATACCATTTTTTATTAAGAAATTTGGTT<br/> AAAGTTATTATGGCATAAGATAGCGGATGTCCGATTAGTTAGTTGGTAAGGT<br/> AATGGCTTACCAAGACAATGATCGGTAGGGGTCCTGAGAGGGCATAACCCCA<br/> CATTGGGACTGAGACACGGACCAAACCTTCTACGGAAGGCAGCAGTGAGGAAT<br/> ATTGGTCAATGGAGGCAACTCTGAACCAGCCACTCCGCGTGTAGGAGGAAAG<br/> CCATTTAGGTTGTAACTACTTTTGTATATGAATAAAAAATTCTATTTTTAGAAA<br/> AAATTGAATGTAATATACGAATAAGTATCGGCCAACTCTGTGCCAGCAGCCGC<br/> GGTAAACCGGAGGATACGAGCGCTATCCGGATTTATTGGGTTTAAAGGGTGC<br/> GTAGGTGGTTTTTAAAGTCAGTAGTGAATCTTAAAGCTTAACTTTAAAAGTGC<br/> TATTGATACTGATAAACTAGAGTGAGGTTGGAGTAACTGGAATGTGTGGTGGAA<br/> GCGGTGAAATGCATAGAGATCACACAGAACCCGATCGCGAAAGCAGGTTAC<br/> TAAACATAGACTGACGCTGAGGCACGAAAGCATGGGGAGCAAACAGGATTAG<br/> ATACCCTGGTAGTCCATGCCGTAAACGATGATCACTAACTATTGGAGAATAATT<br/> CAGTGGTCAAGCGAAAGTGATAAGTGATCCACCTGAGGAGTACGACCGCAAG<br/> GTTGAAACTCAAAGGAATTGACGGGGGCCCGCACAAATCGGTGGAGCATGTGG<br/> TTTAATTCGATGATACGCGAGGAACCTTACCAAACTTAAATGTATTACGAATA<br/> AATTGGAAACAATTTAGTCATTAGACGGAGTACAAGGTGCTGCATGGTTGTGCG<br/> TCAGCTCGTGCCGTGAGGTGTGAGGTTAAGTCCTTTAACGAGCGCAACCCTT<br/> ATTATTAGTTACCATCAAGTAATGTTGGGACTCTAATAAGACTGCCGGCGTA<br/> AGCCGAGAGGAAGGCGGGGACGACGTCAAATCATCACGGCCCTTATGTTTTG<br/> GGCCACACACGTGCTACAATGGTCGGTACAGAGGGGAGCAACTGGGTGACC<br/> AGAAGCAGATCTTGAAAGCCGATCTCAGTTTCGATTGGAGTCTGCAACTCGAC<br/> TCTATGAAGCTGGAATCGCTAGTAATCGCGCATCAGCCATGGCGCGGTGAAT<br/> ATGTTCCCGGGCCTTGTACACACCGCCCGTCAAGCCATGGAAGTTTGAAGTA<br/> CCTAAAATCGGTGACCTTGAGAGAAGGGAAGTCCGAAGGTAAGTCAATAA<br/> CTAGGGCTAAGTCGTAACAAGGTAACCCAT<br/> ACGAGCGCGGGCGGCAGGCCTAACACATGCAAGTCGAGCGAACGTCCTTCG<br/> AAGGACGTAAGCGGCGGACGGGTGAGTAACACGTAAGAATCTACCTCGCTCA<br/> ACGGCACAACGCAGGGAAGCCTGCGCTAATTCCGTATGAATCCTGAATCAGG<br/> TAAAGATCCTTCGGAGCGAGATGAGCTTGCCTAGATTAGCTTGTGGTGGG<br/> GTAAATGCCACCAAGGCAACGATCTATAGCTGGTCTGGGAGGACGGACAGC<br/> CACACTGGGACTGGAACAAGGCCAGACCCCGTGGGGGTCAGCAGTGAGG<br/> AATATTGGACAATGGGCGAAAGCCTGATCCAGCCATGCCGCGTGAGTGATTA<br/> GAAGTCAAACCTTCTGAAGTTTTGTGAAAATTGAAAACCTTTTTGCCAAACGA<br/> AATGATGATGGTAGTTTGGACGAATAAGCTCCGGCCAACTTCGTGCCAGCAG<br/> CCGCGGTAATACGAGGGGAGCAAGCGTTGTTCCGTTTTATTGGGCGTAAAGC<br/> GCGCGTAGGCGGCCACGCAAGTCGTTTCAGAAGTCAAACGATGGAGCTCAAC</p> |
| Clone PR-9<br>( <i>Hodgkinia</i> ) | <p>AGAGTTTGATCATGGCTCAGGATAAACGCTAGCGGAGGGCATAACACATGCA<br/> AGTCGAGGGGCATCAAAAAAATATAAGTTTACTTATGTTTTTTGTTTGGCAAC<br/> CGGCGTACGGGTGAGTAATACATACGTAACCTTCCTTATGCTGAAGGATAGCC<br/> CGAGGAACTTGGATTAATACTTCATAATACCATTTTTTATTAAGAAATTTGGTT<br/> AAAGTTATTATGGCATAAGATAGCGGATGTCCGATTAGTTAGTTGGTAAGGT<br/> AATGGCTTACCAAGACAATGATCGGTAGGGGTCCTGAGAGGGCATAACCCCA<br/> CATTGGGACTGAGACACGGACCAAACCTTCTACGGAAGGCAGCAGTGAGGAAT<br/> ATTGGTCAATGGAGGCAACTCTGAACCAGCCACTCCGCGTGTAGGAGGAAAG<br/> CCATTTAGGTTGTAACTACTTTTGTATATGAATAAAAAATTCTATTTTTAGAAA<br/> AAATTGAATGTAATATACGAATAAGTATCGGCCAACTCTGTGCCAGCAGCCGC<br/> GGTAAACCGGAGGATACGAGCGCTATCCGGATTTATTGGGTTTAAAGGGTGC<br/> GTAGGTGGTTTTTAAAGTCAGTAGTGAATCTTAAAGCTTAACTTTAAAAGTGC<br/> TATTGATACTGATAAACTAGAGTGAGGTTGGAGTAACTGGAATGTGTGGTGGAA<br/> GCGGTGAAATGCATAGAGATCACACAGAACCCGATCGCGAAAGCAGGTTAC<br/> TAAACATAGACTGACGCTGAGGCACGAAAGCATGGGGAGCAAACAGGATTAG<br/> ATACCCTGGTAGTCCATGCCGTAAACGATGATCACTAACTATTGGAGAATAATT<br/> CAGTGGTCAAGCGAAAGTGATAAGTGATCCACCTGAGGAGTACGACCGCAAG<br/> GTTGAAACTCAAAGGAATTGACGGGGGCCCGCACAAATCGGTGGAGCATGTGG<br/> TTTAATTCGATGATACGCGAGGAACCTTACCAAACTTAAATGTATTACGAATA<br/> AATTGGAAACAATTTAGTCATTAGACGGAGTACAAGGTGCTGCATGGTTGTGCG<br/> TCAGCTCGTGCCGTGAGGTGTGAGGTTAAGTCCTTTAACGAGCGCAACCCTT<br/> ATTATTAGTTACCATCAAGTAATGTTGGGACTCTAATAAGACTGCCGGCGTA<br/> AGCCGAGAGGAAGGCGGGGACGACGTCAAATCATCACGGCCCTTATGTTTTG<br/> GGCCACACACGTGCTACAATGGTCGGTACAGAGGGGAGCAACTGGGTGACC<br/> AGAAGCAGATCTTGAAAGCCGATCTCAGTTTCGATTGGAGTCTGCAACTCGAC<br/> TCTATGAAGCTGGAATCGCTAGTAATCGCGCATCAGCCATGGCGCGGTGAAT<br/> ATGTTCCCGGGCCTTGTACACACCGCCCGTCAAGCCATGGAAGTTTGAAGTA<br/> CCTAAAATCGGTGACCTTGAGAGAAGGGAAGTCCGAAGGTAAGTCAATAA<br/> CTAGGGCTAAGTCGTAACAAGGTAACCCAT<br/> ACGAGCGCGGGCGGCAGGCCTAACACATGCAAGTCGAGCGAACGTCCTTCG<br/> AAGGACGTAAGCGGCGGACGGGTGAGTAACACGTAAGAATCTACCTCGCTCA<br/> ACGGCACAACGCAGGGAAGCCTGCGCTAATTCCGTATGAATCCTGAATCAGG<br/> TAAAGATCCTTCGGAGCGAGATGAGCTTGCCTAGATTAGCTTGTGGTGGG<br/> GTAAATGCCACCAAGGCAACGATCTATAGCTGGTCTGGGAGGACGGACAGC<br/> CACACTGGGACTGGAACAAGGCCAGACCCCGTGGGGGTCAGCAGTGAGG<br/> AATATTGGACAATGGGCGAAAGCCTGATCCAGCCATGCCGCGTGAGTGATTA<br/> GAAGTCAAACCTTCTGAAGTTTTGTGAAAATTGAAAACCTTTTTGCCAAACGA<br/> AATGATGATGGTAGTTTGGACGAATAAGCTCCGGCCAACTTCGTGCCAGCAG<br/> CCGCGGTAATACGAGGGGAGCAAGCGTTGTTCCGTTTTATTGGGCGTAAAGC<br/> GCGCGTAGGCGGCCACGCAAGTCGTTTCAGAAGTCAAACGATGGAGCTCAAC</p> |

TCCATTCCGCTTCCGATACTACGCGGCTTGAGGTCGGTGGAGGCGAACGGAA  
CTCCAAGTGTAGAGGTGAAATTCGTTGATATTTGGGGGAACACCGGAGGCGA  
AAGCGGTTCCGCATGCCGATTCTGACGCTGATGCGCTAAAGCGTGGGGAGCA  
AACAGGATTAGATACGCTGGTAGTCCACGCCCTGAACGATGGGTGCTAACAG  
CTGAAAACCAAACGTTCAAGTTTTCGTTTTGATTGTAAAGCTAACGCGTGAAG  
CACTCCGCCTGGGGAGTACGGCCGCAAGGTTGAAACTCAAAGGAACTGACG  
GGGACCCGCACAAGCGGTGGAGCATGTGGTTAATTGAATCTGCACGTAAA  
ACCTTACCAGCCTTGACATTGTAGGTCGGTTGTGCGACAGAAACGTTCCGAA  
CCAATGACCTCGCAACAGGTGCTGCATGGCTGCCGTCAGCTCGTGTCTGTGAG  
ACGTACGGTTAAGTCCTATAACGAGCGCAACCCTCGTCCTTAGTTGCTTCCAA  
GCGAAAGCTAGCTCTCTAAGGAGACTGCCGTTACAAGCTGGAGGAAGGGGA  
GGACGACGACAAGTCATCATGGCCTTTATAGGCTGGGCTACACACGTGCTAC  
AATGGTGGTGAACAGAAAGTCGCAATGCCGCGAGGCGGAGCAAATCTCCAA  
ACCCACCTCAGTACGGATTGTACCCTGCAACTCGGGTACATGAAGCAGGAA  
TCGCTAGTAATCGCGGATCAGCATGCCGCGGTGAATACGTTCTCGGGTCTG  
TACACACCGCCCGTCACACCATGGAAGTAACTTCGCTCCAATCCGTTGCGTC  
AGCACGGACAAAGCGAAGTTGACGACCGAGGTG  
AACGAGCGCTGGCGGCAGGCCTAACACATGCAAGTCGAGCGAACGTCCTTC  
GAAGGACGTAAGCGGCGAACGGGTAAGTAACACGTAAGAATCTACCTTGCTT  
AACGGCACAACGCACGTAACGTGCGCTAATTCCGTATAAATCCTGCATCAGGT  
AAAGAACTTTGGAAGCAAGATGAGCTTGCGCTAGATTAGCTCGTTGGTGGGGT  
AAATGCCACCAAGGCAACGATCTATAGCTGGTCTGGGAGGACGGACAGCCA  
CACTGGGACTGAAACAAGGCCAGACCCCGCGGGGGTACGACGTGAGGAA  
TATTGGACAATGGGCGAAAGCCTGATCCAGCCATGCCGCGTGAGTGATTGGA  
AGTTTAATCTTCCGAAGTTCTTTGCGAACTGTAAATCTCTTTGCCAACGAAA  
ATGATGATGGTAGTTTAAGCGAATAAGCTCCGGCCAACTTCGTGCCAGCAGC  
CGCGTAATACGAGGGGAGCAAGCGTTGTTGCGTTTTATTGGCGTAAAGCG  
CGCGTAGGCGGCCACGCAAGTCGTTTCAGAAGTCAAACGATGGAGCTCAACT  
CCATTTGCTTCCGATACTACGTGACTTGAGGTCGGCGGAGGCGAACGGAAC  
TCCAAGTGTAGAGGTGAAATTCGTTGATATTTGGGGGAACACCAGAGGCGAA  
AGCGGTTCCGCATGCCGATTCTGACGCTGATGCGCTAAAGCGTGGGGAGCAA  
ACAGGATTAGATACCCTGGTAGTCCACGCCCTGAACGATGAGTGCTAACGGT  
TGAAAACCAAACACAGTTTTCGTTTTGATTGTAAAAGCTAACGCGTTAAGCAC  
TCCGCCTGGGGAGTACGGCCGCAAGGTTGAAACTCAAAGGAATTGACGGGG  
ACCCGCACAAGCGGTGGAGCATGTGGTTAATTGAATCTGCACGCAAACCC  
TTACCAGCCTTTGACATTGTAGGTCGGTTGTGCGACAGAAACGTTCCGAACCA  
ATGACCTTGCAACAGGTGCTGCATGGCTGCCGTCAGCTCGTGTCTGTGAGACG  
TACGGTTAAGTCCTATAACGAGCGCAACCCTCGTCCTTAGTTGCTTCCAAGCG  
AAAGCTAGCTCTCTAAGGAGACTGCCGTTATAAGCTGGAGGAAGGGGAGGA  
CGACGACAAGTCATCATGGCCCTTATAGGCTGGGCTACACACGTGCTACAAT  
GGTGGAAGCAGAAAGTCGCAATGCCGCGAGGCGGAGCAAATCTCCAAAGCC  
CACCCCAGTACGGATTGTACCCTGCAACTCGGGTACATGAAGCAGGAATCGC  
TAGTAATCGCGGATCAGCATGCCGCGGTGAATACGTTCTCGGGTCTGTACA

Clone PR-96  
(*Hodgkinia*)

CACCGCCCGTCACACCATGGGAGCGGGGTCCGTGCGAAGCGTGAGCGAAGC  
TCCGTCAAGGCGGACTTAGCGACCGAGGTG

AACGAGCGCTGGCGGCAGGCCTAACACATGCAAGTCGAGCGAACGTCCTTC  
GAAGGACGTAAGCGGCGAACGGGTGAGTAACACGTAAGAATCTACCTCGCTC  
AACGGCGCAACGCACGTAACGTGCGCTAATTCCGTATGAATCCTACATCAGGT  
AAAGATCCTTCGGAGCGAGATGAGCTTGCCTAGATTAGCTCGTTGGTGGGG  
TAAATGCCACCAAGGCCACGATCTATAGCTGGTCTGGGAGGACGGACAGCC  
ACACTGGGACTGAAACAAGGCCAGACTCCCGCGGGAGTCAGCAGTGAGGA  
ATATTGGACAATGGGCGAAAGCCTGATCCAGCCATGCCGCGTGAGTGATTAG  
AAGTCTAATCTTCCGAAGGTTTGTAAAGAACTGTAAACCTCTTTTGCAAACGAA  
AATGATGATTGTAGTTAAGCGAATAAGCTCCGGCCAACCTCGTGCCAGCAGC  
CGCGGTAATACGAGGGGAGCAAGCGTTGTTCCGTTTTATTGGGCGTAAAGCG  
CGCGTAGGCGGCCACGCAAGTCGTTTCAGAAGTCAAACGATGGAGCTCAACT  
CCATTTTCGTTCCGATACTACGTGGCTTGGTTCGGTGGAGGCGAACGGAAC  
TCCAAGTG TAGAGGTGAAATTCGTTGATATTTGGAGGAACACCAGAGGGCGAAA  
GCGGTTCTCCATGCCGATTCTGACGCTGATGCGCTAAAGCGTG GGGGAGCGAAA  
CAGGATTAGATACCCTGGTAGTCCACGCCCTGAACGATGAGTGCTAACAGTT  
GAAAACCAAACATGGTTTTCGTTTTGATTGTAAAGCTAACGCGTGAAGCACTC  
CGCCTGGGGAGTACGGCCGCAAGGTTGAAACTCAAAGGAACTGACGGGGAC  
CCGCACAAGCGGTGGAGCATGTGGTTAATTGCAAGCTGCACGTAAAACCTTA  
CCAGCCTTTGACATTGTAGTTCGGTTGCTGACAGAAACGTCCGCACCCAATG  
ACCTTGCAACAGGTGCTGCATGGCTGCCGTCAGCTCGTGTCTGTGAGACGTAC  
GGTTAAGTCTATAACGAGCGCAACCCCTCATCCATAGTTGCTTCCAAGCGAAA  
GCTAGCTCTCTACGGAACTGCCGTTATAAGCTGGAGGAAGGGGAGGACGA  
CGACAAGTCATCATGGCCTTTATAGGCTGGGCTACACACGTGCTACAATGGTG  
GTGAAACAGAAAAGTCGCAATGCCGCGAGGCGGAGCAAATCTCCAAACCCAC  
CCCAGTACGGATTGTACCCTGCAACTCGGGTACATGAAGCAGGAATCGCTAG  
TAATCGCGGATCAGCATGCCGCGGTGAATACGTTCTCGGGTCTGTACACAC  
CGCCCGTCACACCATGGGAGTG

Clone PR-131  
(*Hodgkinia*)

AACGAGCGCTGGCGGCAGGCCTAACACATGCAAGTCGAGCGAACGTCCTTC  
GAAGGACGTAAGCGGCGGACGGGTGAGTAACACGTAAGAATCTACCTTGTTT  
AACGGCACAACGCACGTAACGTGCGCTAATTCCGTATAAATCCTGCATCAGGT  
AAGGAACTTTCGGAACAAGATGAGCTTGCCTAGATTAGCTCGTTGGTGGGG  
TAAATGCCACCAAGGCAACGATCTATAGCTGGTCTGGGAGGACGGACAGCC  
ACACTGGGACTGAAACAAGGCCAGACCCCGCGGGGGTTCAGCAGTGAGGA  
ATATTGGACAATGAGCGCAAGCTTGTATCCAGCTATGCCGCGTGAGCGATTGG  
AAGTCTAATCTTCCGAAGGTTCTTTAAGAACTGTAAACCTCTTTTGCTAACGAA  
AATGATGATTGTAGTTAAGCGAATAAGCTCCGGCCAACCTCGTGCCAGCAGC  
CGCGGTAATACGAGGGGAGCAAGCGTTGTTCCGTTTTATTGGGCGTAAAGCG  
CACGTAGGCGGTGCGCAAGTCGATAACAGAAACAGAAGTCAAACGATGGAG  
CTCAACTCCATTTTCGTTCCGATACTACGTGACTTGAGGTCGGTGGAGGTGAA  
CGGAACTCCAAGTG TAGAGGTGAAATTCGTTGATATTTGGAGGAACACCAGAG  
GCGAAAGCGGTTCTCCATGCCGATTCTGACGCTAATGTGCTAAAGCGTG GGG  
AGCAAACAGGATTAGATACCCTGGTAGTCCACGCCCTGAACGATGAGTGCTA

Clone PR-187  
(*Hodgkinia*)

ACAGTTGAAAACCAAACCTTACGTTTTCGTTTTTGATTGTAAAGCTAACGCGTTA  
AGCACTCCGCCTGGGGAGTACGGCCGCAAGGTTGAAACTCAAAGGAATTGAC  
GAGGACCCGCACAAGCGGTGGAGCATGTGGTTAATTCGAAGCTGCACGTAA  
AACCTTACCAGCCTTTGACATTGTAGGTGGTTGTGCGACAGAAACGTACGCA  
ACCAATGACCTCGCAACAGGTGCTGCATGGCTGCCGTCAGCTCGTGTCTGTA  
GACGTACGGTTAAGTCCTATAACGAGCGCAACCCTCGTCCTTAGTTGCTTCCA  
AGCGAAAGCTAGCTCTCTAAGGAGACTGCCGTTATAAGCTGGAGGAAGGGG  
AGGACGACGACAAGTCATCATGGCCCTTATAGGCTGGGCTACACACGTGCTA  
CAATGGTGAAGCAGAAAGTCGCAATGCCGCGAGGCGGAGCAAATCTCCAAA  
GCCACCCCAGTACGGATTGTACCCTGCAACTCGGGTACATGAAGCAGGAAT  
CGCTAGTAATCGCGGATCAGCATGCCGCGGTGAATATGTTCCCGGGCCTTGT  
ACACACCGCCCGTCAAGCCATGGAAGT

AACGAGCGCTGGCGGCAGGCCTAACACATGCAAGTCGAGCGAACGTCCTTC  
GAAGGACGTAAGCGGCGGACGGGTGAGTAACACGTAAGAATCTACCTTGTTCC  
AACGGCACAACGCACGTAACGTGCGCTAATTCCGTATAAATCCTGCATCAGGT  
AAAGAACTTTTCGGAACAAGATGAGCTTGCCTAGATTAGCTCGTTGGTGGGGT  
AAATGCCACCAAGGCAACGATCTATAGCTGGTCTGGGAGGACGGACAGCCA  
CACTGGGACTGAAACAAGGCCAGACCCCGCGGGGGTACGACGTGAGGAA  
TATTGGACAATGAGCGCAAGCTTGATCCAGCTATGCCGCGTGAGCGATTGGA  
AGTCTAATCTTCCGAAGGTTCTTTAAGAACTGTAAACCTCTTTTGCTAACGAAA  
ATGATGATTGTAGTTTAAGCGAATAAGCTCCGGCCAACTTCGTGCCAGCAGCC  
GCGGTAATACGAGGGGAGCAAGCGTTGTTCCGTTTTATTGGCGTAAAGCGC  
ACGTAGGCGGTTCGCGCAAGTCGATAACAGAAACAGAAGTCAAACGATGGAGC  
TCAACTCCATTTTCGTTCCGATACTACGTGACTTGAGGTCGGTGGAGGTGAAC  
GGAACTCCAAGTGTAGAGGTGAAATTCGTTGATATTTGGAGGAACACCAGAG

Clone PR-215  
(*Hodgkinia*)

GCGAAAGCGTTCTCCATGCCGATTCTGACGCTAATGTGCTAAAGCGTGGGG  
AGCAAACAGGATTAGATACCCTGGTAGTCCACGCCCTGAACGATGAGTGCTA  
ACAGTTGAAAACCAAACCTTACGTTTTCGTTTTTGATTGTAAAGCTAACGCGTTA  
AGCACTCCGCCTGGGGAGTACGGCCGCAAGGTTGAAACTCAAAGGAATTGAC  
GAGGACCCGCACAAGCGGTGGAGCATGTGGTTAATTCGAATCTGCACGTAA  
AACCTTACCAGCTCTTGACCCTGTTTCCGAGTGGTTTTGGAAACACACCTCT  
CGATGGCAAACAACAGGTGCTGCATGGCTGCCGTCAGCTCGTGTCTGTGAGAC  
GTACGGTTAAGTCCTATAACGAGCGCAACCCTCGTCCTTAGTTGCTTCCAAGC  
GAAAGCTAGCTCTCTAAGGAGACTGCCGTTATAAGCTGGAGGAAGGTGGGG  
ACGACGACAAGTCATCATGGCCCTTATGAGCTGGGCTACACACGTGCTACAAT  
GGTGGTGAACAGAAAGTCGCAATGCCGCGAGGCGGAGCAAATCTCCAAACC  
CCACCTCAGTACGGATTGTACCCTGCAACTCGGGTACATGAAGCAGGAATCG  
CTAGTAATCGCGGATCAGCATGCCGCGGTGAATACGTTCTCGGGTCTGTAC  
ACACCGCCCGTCACACCATGGGAGCGGGTCCGCCGTAAGCGTGAGCGAAG  
CTCCGTCAGGGCGGACTTAGCGACCGAGGTG

*Rickettsia*

CACTTTATGAAATAATGCTAATACCGTATATTCTTCCGAGGAAAGATTTATC  
GCTGATGGATGAGCCCGCTCAGATTAGGTAGTTGGTAGGGTAATGGCCTAC  
CAAGCCAACGATCTGTAGCTGGTCTGAGAGGATGATCAGCCACACTGGGACT  
GAGACACGGTCCAGACTCCTACGGGAGGCAGCAGTGGGGAATATTGGACAAT

GGGCGAAAGCCTGATCCAGCAATACCGAGTGGGTGACGAAGACCTTAGGGTT  
GTAAAGCCCTTTTCAGCAGGGAAGATAATGACGGTACCTGACCAAGAAAGCC  
CCGGCTAACTCCGTGCCAGCAGCCGCGGTAAGACGGAGGGGGCTAGCGTTG  
TTCGGAATTACTGGGCGTAAAGAGTGCCTAGGCGGTTTAGTAAGTTGGAAGT  
GAAAGCCCGAGGCTTAACCTCGGAACTGCTTTCAAACACTACTAATCTAGAGGG  
TAGTAGGGGATGATGGAATTCCTAGTGTAGAGGTGAAATTCCTAGATATTAGG  
AGGAACACCGGTGGCGAAGGCGGTTCATCTAGGCTACAACCTGACGCTGATGCA  
CGAAAGCGTGGGGAGCAAACAGGATTAGATAACCCTGGTAGTCCACGCCGTAA  
ACGATGAGTGCTAGATATCGGGAGAATTTCTTTTCGGTTTCGTAGCTAACGCAT  
TAAGCACTCCGCCTGGGGAGTACGGTCGCAAGATTAACCTCAAAGGAATTG  
ACGGGGACTCGACAAGCGGTGGAGCATGCGGTTTAATTCGATGTTACGCGA  
AAAACCTTACCAACCCTTGACATGGTGGTTGCGGGAAACAGAGATGCATCCCT  
TCAGTTCGGCTGGACCACACACAGGTGTTGCATGGCTGTCGTCAGCTCGTGT  
CGTGAGATGTTGGGTTAAGTCCCGCACGAGCGCACCCCTCATTCTTATTGGCA  
GCGCGTAATGCCGGGAGTATAGGGAACCTGGCCGTCGATAGCCTGGAGGAAG  
TGGGGACTATGTTCAAGTCC  
TAATGAATGTTAGCTACCTACTTCTTTTGAACCCACTCCCATGGTGTGACGG  
GCGGTGTGTACAAGGCCCGGGAACGTATTCACCGCGACATGCTGATCCGCGA  
TTACTAGCGATTCCGACTTCATGGAGTCGAGTTGCAGACTCCAATCCGGACTT  
AAACGTACTTTCTGAGTTCGGCTTCCCCTCGCGGGCTTGCCTCTCTCTGTATA  
CGCCATTGTAGCACGTGTGTAGCCCTACTCGTAAGGGCCATGATGACTTGAC  
GTCATCCCCACCTTCTCCGGTTTATCACCGGCAGTCTCCTTTGAGTTCCCGA  
CTTTACTCGCTGGCAACAAAGGATAAGGGTTGCGCTCGTTGCGGGACTTAAC  
CCAACATTTCAACAACAGAGCTGACGACAGCCATGCAGCACCTGTCTCAGAG  
TTCCCGAAGGCACTCTTCTATCTCTAAAAGATACTCTGGATGTCAAGAGTAGG  
TAAGGTTCTTCGCGTTGCATCGAATTAACCACATGCTCCACCGCTTGTGCGG  
GCCCCGTCAATTCATTTGAGTTTTAACCTTGC GGCCGTA CTCCCAGGCGGT  
CGATTTAACGCGTTAGCTCCGGAGGCCACGGTTCATGACCACAACCTCCAAAT  
CGACATCGTTTACAGCGTGGACTACCAGGGTATCTAATCCTGTTTGCTCCCCA  
CGTTTTCGCACATGAGCGTCAGTCTTTATCCAGTGGATCGCCTTCGCCACTGG  
TATTCCTCCACATCTCTACGCATTTACCGCTACATGTGGAATTCTATCCACCT  
CTATAAGACTCTAGTTAATCAGTTTTGAATGCCATTCCCAGGTTAAGCCCGGG  
GATTTACATTCAACTTAATTAACCGCTGCGTGCCCTTTACGCCAGTAATTC  
CGATTAACGCTCGCACCCCTCCGTATTACCGCGGCTGCTGGCACGGAGTTAGC  
CCGGTGCTTCTTCTGTTGCTAACGTCAATTGCTAAGAGTATTAATCTTAACACC  
TTTCCTCACAACCTGAAAGTACTTTACAACCCGAAGGCCTTCTTCATACACATGG  
CATAGCTGCAGTAT

*Arsenophonus*

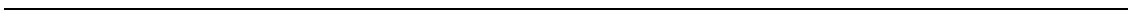

**Table S3** NCBI blast results for the 16S rRNA gene sequences of the representative clones obtained from the bacteriomes of *Pycna repanda* males

| No. of representative clones of different RFLP profiles | The percentage in clone library | Closest match in GenBank                                      | Identity to closest match (%) |
|---------------------------------------------------------|---------------------------------|---------------------------------------------------------------|-------------------------------|
| Clone PR-16 ( <i>Sulcia</i> )                           | <b>63%</b>                      | <i>Sulcia</i> of <i>Platypleura kaempferi</i><br>(LC370623.1) | <b>99%</b>                    |
|                                                         |                                 | <i>Sulcia</i> of <i>Pl. yaeyamana</i><br>(LC370627.1)         | <b>99%</b>                    |
|                                                         |                                 | <i>Sulcia</i> of <i>Pl. kuroiwae</i> (LC370624.1)             | <b>99%</b>                    |
| Clone PR-9 ( <i>Hodgkinia</i> )                         | <b>1%</b>                       | <i>Hodgkinia</i> of <i>Pl. kuroiwae</i><br>(LC370476.1)       | <b>92.54%</b>                 |
|                                                         |                                 | <i>Hodgkinia</i> of <i>Pl. yaeyamana</i><br>(LC370501.1)      | <b>91.76%</b>                 |
|                                                         |                                 | <i>Hodgkinia</i> of <i>Pl. kaempferi</i><br>(LC370463.1)      | <b>91.72%</b>                 |
| Clone PR-96 ( <i>Hodgkinia</i> )                        | <b>30%</b>                      | <i>Hodgkinia</i> of <i>Pl. kuroiwae</i><br>(LC370476.1)       | <b>92.43%</b>                 |
|                                                         |                                 | <i>Hodgkinia</i> of <i>Pl. yaeyamana</i><br>(LC370501.1)      | <b>91.71%</b>                 |
|                                                         |                                 | <i>Hodgkinia</i> of <i>Pl. kaempferi</i><br>(LC370463.1)      | <b>90.78%</b>                 |
| Clone PR-131 ( <i>Hodgkinia</i> )                       | <b>1%</b>                       | <i>Hodgkinia</i> of <i>Pl. kuroiwae</i><br>(LC370476.1)       | <b>93.52%</b>                 |
|                                                         |                                 | <i>Hodgkinia</i> of <i>Pl. yaeyamana</i><br>(LC370501.1)      | <b>92.65%</b>                 |
|                                                         |                                 | <i>Hodgkinia</i> of <i>Pl. kaempferi</i><br>(LC370463.1)      | <b>91.49%</b>                 |
| Clone PR-187 ( <i>Hodgkinia</i> )                       | <b>0.5%</b>                     | <i>Hodgkinia</i> of <i>Pl. kuroiwae</i><br>(LC370476.1)       | <b>91.55%</b>                 |
|                                                         |                                 | <i>Hodgkinia</i> of <i>Pl. yaeyamana</i><br>(LC370501.1)      | <b>91.03%</b>                 |
|                                                         |                                 | <i>Hodgkinia</i> of <i>Pl. kaempferi</i><br>(LC370463.1)      | <b>90.52%</b>                 |
| Clone PR-215 ( <i>Hodgkinia</i> )                       | <b>4.5%</b>                     | <i>Hodgkinia</i> of <i>Pl. kuroiwae</i><br>(LC370476.1)       | <b>90.95%</b>                 |
|                                                         |                                 | <i>Hodgkinia</i> of <i>Pl. yaeyamana</i><br>(LC370501.1)      | <b>90.44%</b>                 |
|                                                         |                                 | <i>Hodgkinia</i> of <i>Pl. kaempferi</i><br>(LC370463.1)      | <b>90.52%</b>                 |



*Hodgkinia* of *Pl. kaempferi*  
(LC370463.1)

**92.45%**

---

**Table S4** Prevalence of dominant symbionts in different tissues of *Pycna repanda* using diagnostic PCR amplifications <sup>a</sup>

| Symbiont            | Numbers of positive individuals/total numbers of individuals tested <sup>b</sup> |       |       |       |       |       |       |       |                    |
|---------------------|----------------------------------------------------------------------------------|-------|-------|-------|-------|-------|-------|-------|--------------------|
|                     | SG                                                                               | FC    | CS    | MG    | HG    | MT    | TE    | OV    | BA                 |
| <i>Sulcia</i>       | 0/55                                                                             | 0/55  | 0/55  | 0/55  | 0/55  | 0/55  | 0/30  | 25/25 | 55/55              |
| <i>Hodgkinia</i>    | 0/55                                                                             | 0/55  | 0/55  | 0/55  | 0/55  | 0/55  | 0/30  | 25/25 | 55/55              |
| <i>Arsenophonus</i> | 0/55                                                                             | 0/55  | 0/55  | 0/55  | 0/55  | 0/55  | 0/30  | 23/25 | 50/55 <sup>c</sup> |
| <i>Rickettsia</i>   | 55/55                                                                            | 55/55 | 55/55 | 55/55 | 55/55 | 55/55 | 30/30 | 0/25  | 0/55               |

<sup>a</sup> A total of 55 individuals were used in this study, 30 males and 25 females.

<sup>b</sup> Abbreviations: SG, salivary glands; FC, filter chamber; CS, conical segment; MG, midgut; HG, hindgut; MT, Malpighian tubules; TE, testes; OV, ovaries; BA, bacteriomes.

<sup>c</sup> 50 individuals were positive detection, 27 males and 23 females.

**Table S5** Ratio of *Hodgkinia* of dark cells to light cells in the bacteriomes <sup>a</sup>

|               | Average numbers of <i>Hodgkinia</i> cells counted in every individual <sup>a</sup> |             | Ratio of DC: LC |
|---------------|------------------------------------------------------------------------------------|-------------|-----------------|
|               | Dark cells                                                                         | Light cells |                 |
| Male (n=15)   | ~205                                                                               | ~1150       | 1: 5.598        |
| Female (n=15) | ~211                                                                               | ~1187       | 1: 5.619        |

<sup>a</sup> *Hodgkinia* cells of different colors were found in all observed individuals. We randomly selected multiple sections from 15 males and 15 females for statistical analysis, aiming to estimate the ratio of *Hodgkinia* of dark cells to light cells. Abbreviations: DC, *Hodgkinia* of darker cells; LC, *Hodgkinia* of light cells.

**Table S6** Individuals, tissues and observations for the study of transovarial transmission of bacteriome-associated symbionts.

| Transmission process                                                          | Numbers of individuals examined <sup>a</sup> |      | Tissues     | Numbers of bacteriocytes/ovarioles observed |
|-------------------------------------------------------------------------------|----------------------------------------------|------|-------------|---------------------------------------------|
|                                                                               | TEM                                          | FISH |             |                                             |
| <i>Sulcia</i> and <i>Arsenophonus</i> leaving the peripheral bacteriocytes    | 18                                           | 25   | bacteriomes | ~110                                        |
| <i>Hodgkinia</i> emigrating from the central bacteriocytes                    | 18                                           | 25   | bacteriomes | ~190                                        |
| Symbionts migrating through the follicular cells into the perivitelline space | 18                                           | 25   | ovaries     | ~270                                        |
| Symbionts forming a "symbiont ball" in each egg                               | 18                                           | 25   | ovaries     | ~230                                        |

<sup>a</sup> The transmission process was similar in every individual examined. Mature females were used in the present study. Fourteen females were dissected for FISH and TEM. Eleven females were dissected for FISH. Four females were dissected for TEM.

**Table S7** Statistical analysis showing *Hodgkinia* cells of darker color emigrating from central bacteriocytes through the multi-nuclear compartment to the hemolymph.

|       | Numbers of <i>Hodgkinia</i> cells counted |             |
|-------|-------------------------------------------|-------------|
|       | Dark cells                                | Light cells |
| FM 1  | 437                                       | 0           |
| FM 2  | 393                                       | 0           |
| FM 3  | 411                                       | 0           |
| FM 4  | 221                                       | 0           |
| FM 5  | 491                                       | 0           |
| FM 6  | 401                                       | 0           |
| FM 7  | 354                                       | 0           |
| FM 8  | 284                                       | 0           |
| FM 9  | 189                                       | 0           |
| FM 10 | 253                                       | 0           |
| FM 11 | 282                                       | 0           |
| FM 12 | 167                                       | 0           |
| FM 13 | 225                                       | 0           |
| FM 14 | 309                                       | 0           |
| FM 15 | 442                                       | 0           |
| FM 16 | 228                                       | 0           |
| FM 17 | 248                                       | 0           |
| FM 18 | 459                                       | 0           |

Abbreviations: The numbers (i.e., 1, 2, 3, 4) after FM represented the biological replications.

**Table S8** Statistical analysis revealing numbers of symbiont cells changing their shape during the transovarial transmission process.

| Shape change                   | Symbiont species    | Numbers of cells counted <sup>a</sup> |
|--------------------------------|---------------------|---------------------------------------|
| Irregular to roughly spherical | <i>Sulcia</i>       | 106                                   |
|                                | <i>Hodgkinia</i>    | 892                                   |
| Roughly spherical to irregular | <i>Sulcia</i>       | 168                                   |
|                                | <i>Hodgkinia</i>    | 1262                                  |
| Not obvious                    | <i>Arsenophonus</i> | 1823                                  |

<sup>a</sup> The shape change of related symbionts were observed in every examined individual and we randomly selected multiple sections from different individuals for the cell counts.

**Table S9** Ratio of three different symbionts in the “symbiont balls” at the posterior pole of the oocytes

|       | Numbers of different symbionts counted <sup>a</sup> |                  |                     | Ratio of S: H: A |
|-------|-----------------------------------------------------|------------------|---------------------|------------------|
|       | <i>Sulcia</i>                                       | <i>Hodgkinia</i> | <i>Arsenophonus</i> |                  |
| FM 1  | 185                                                 | 1661             | 686                 | 1: 8.978: 3.708  |
| FM 2  | 193                                                 | 1718             | 702                 | 1: 8.902: 3.637  |
| FM 3  | 189                                                 | 1690             | 693                 | 1: 8.942: 3.667  |
| FM 4  | 179                                                 | 1638             | 679                 | 1: 9.151: 3.793  |
| FM 5  | 194                                                 | 1756             | 705                 | 1: 9.052: 3.634  |
| FM 6  | 185                                                 | 1672             | 685                 | 1: 9.038: 3.703  |
| FM 7  | 183                                                 | 1651             | 678                 | 1: 9.022: 3.705  |
| FM 8  | 195                                                 | 1753             | 720                 | 1: 8.990: 3.692  |
| FM 9  | 188                                                 | 1684             | 691                 | 1: 8.957: 3.676  |
| FM 10 | 185                                                 | 1659             | 684                 | 1: 8.968: 3.697  |
| FM 11 | 196                                                 | 1773             | 722                 | 1: 9.046: 3.684  |
| FM 12 | 183                                                 | 1640             | 679                 | 1: 8.962: 3.710  |
| FM 13 | 192                                                 | 1730             | 707                 | 1: 9.010: 3.682  |
| FM 14 | 187                                                 | 1748             | 697                 | 1: 9.250: 3.727  |
| FM 15 | 194                                                 | 1742             | 724                 | 1: 8.979: 3.732  |
| FM 16 | 190                                                 | 1697             | 701                 | 1: 8.932: 3.689  |
| FM 17 | 197                                                 | 1765             | 728                 | 1: 8.959: 3.695  |
| FM 18 | 187                                                 | 1669             | 685                 | 1: 8.925: 3.667  |

<sup>a</sup> We randomly selected multiple sections from every individual to estimate the ratio of the three different symbionts. Abbreviations: A, *Arsenophonus*; S, *Sulcia*; H, *Hodgkinia*; FM, females. The numbers (i.e., 1, 2, 3, 4) after FM represented the biological replications.

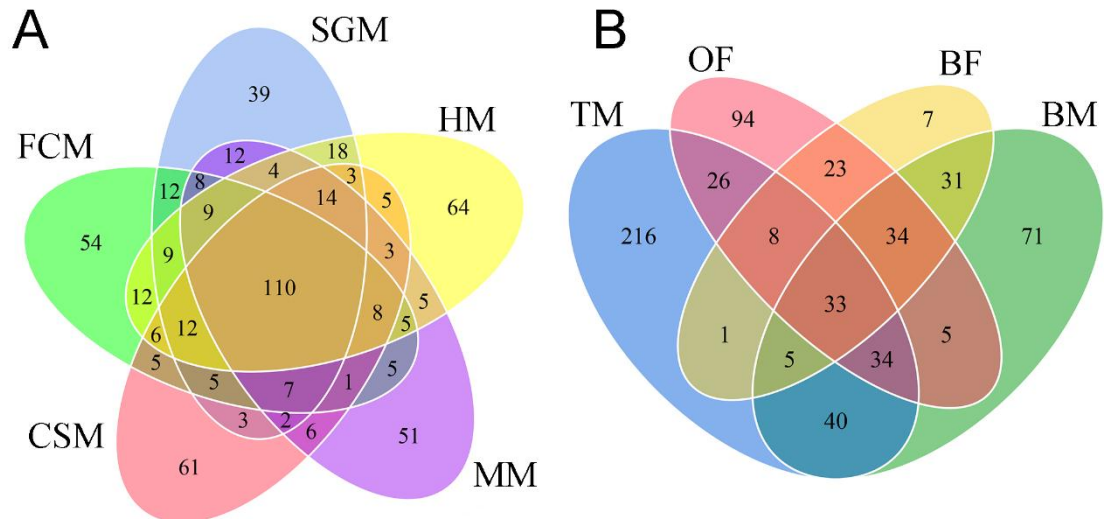

**Fig S1** Venn diagrams showing numbers of the OTUs shared among different tissues of *Pycna repanda*. (A) Numbers of the OTUs are shared among the salivary glands, filter chamber, conical segment, midgut and hindgut of *Py. repanda* males. (B) Numbers of the OTUs shared among the bacteriomes and reproductive organs in both sexes. Abbreviations: SGM, salivary glands of males; FCM, filter chamber of males; CSM, conical segment of males; MM, midgut of males; HM, hindgut of males; TM, testes of males; BM, bacteriomes of males; OF, ovaries of females; BF, bacteriomes of females.



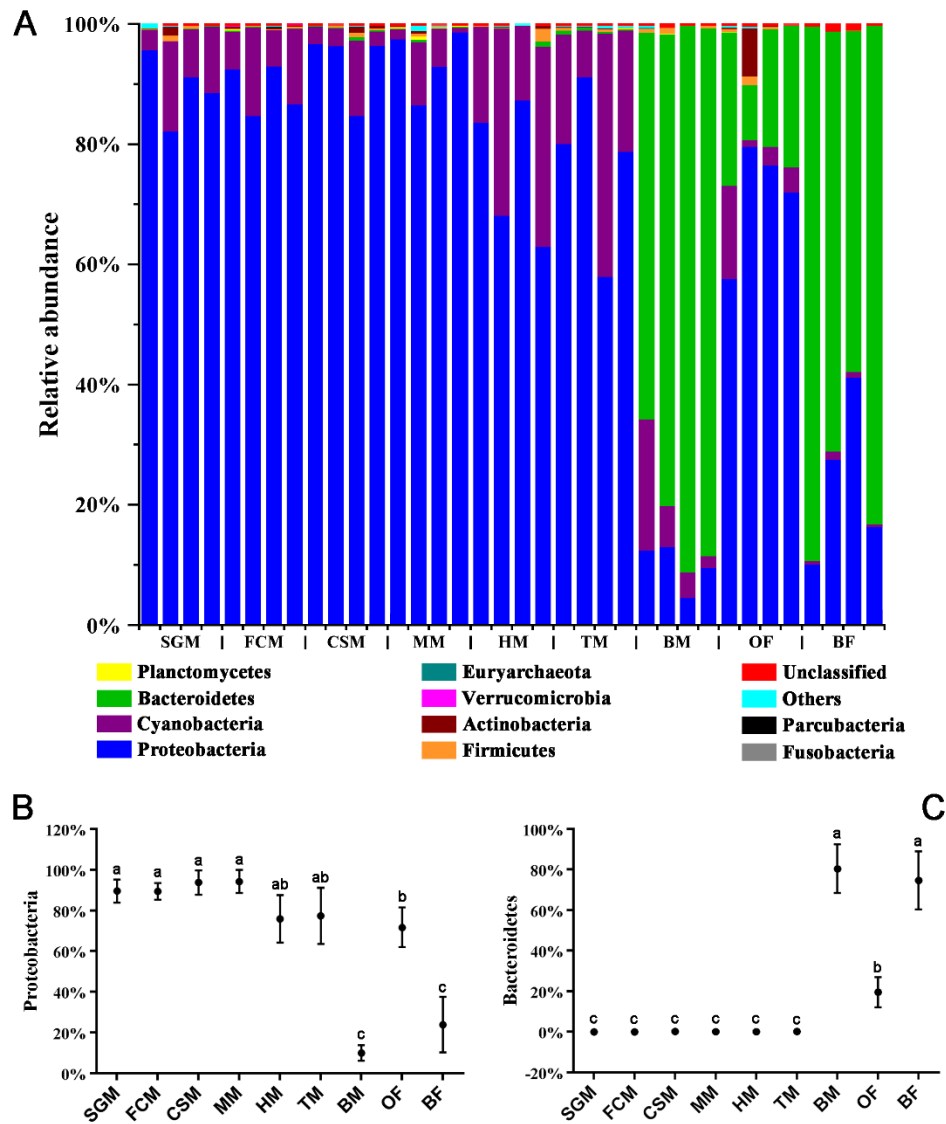

**Fig S2** Bacterial communities of the salivary glands, bacteriomes, reproductive and digestive organs of *Pycna repanda* at the phylum level and comparative analysis of the differences of dominant phyla among different tissues. (A) Bacterial composition of the salivary glands, bacteriomes, reproductive and digestive organs. (B) Comparative analysis of the differences of Proteobacteria among different tissues. (C) Comparative analysis of the differences of Bacteroidetes among different tissues. Different letters represent significant difference at the 0.05 level. Abbreviations: SGM, salivary glands of males; FCM,

filter chamber of males; CSM, conical segment of males; MM, midgut of males; HM, hindgut of males; TM, testes of males; BM, bacteriomes of males; OF, ovaries of females; BF, bacteriomes of females.

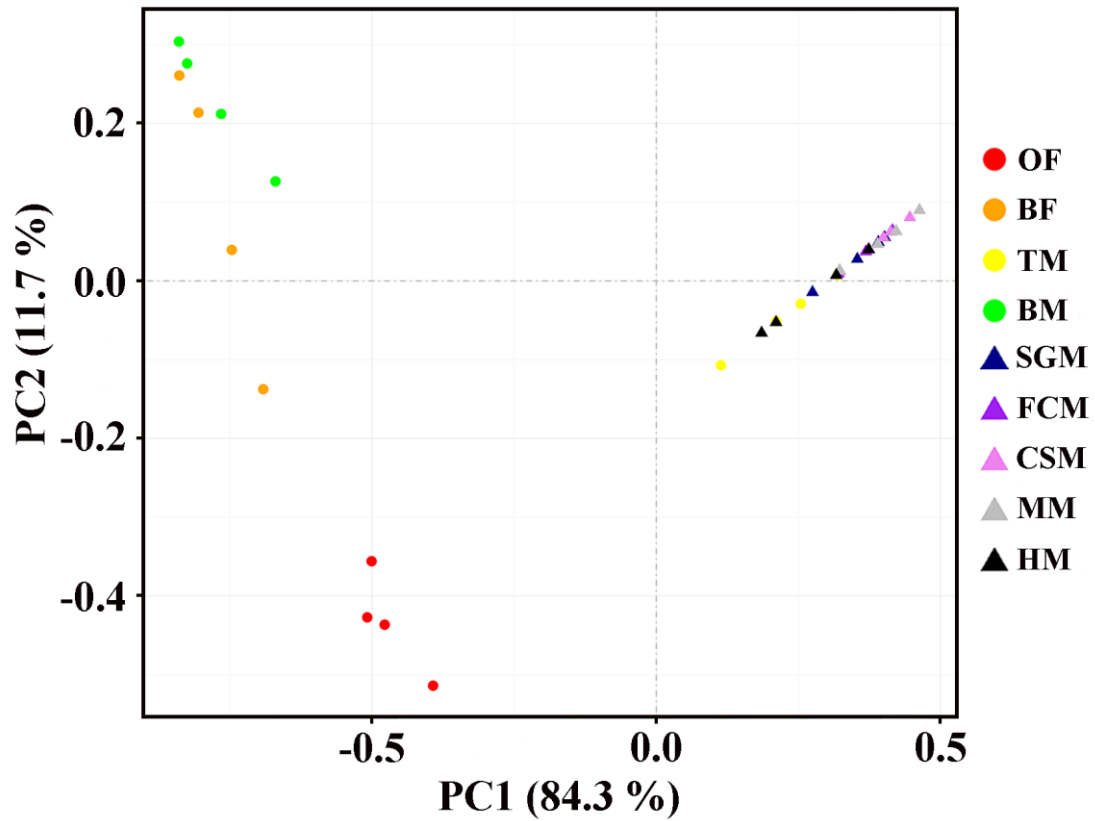

**Fig S3** Principal component analysis revealing the similarity of bacterial communities among different tissues. Abbreviations: SGM, salivary glands of males; FCM, filter chamber of males; CSM, conical segment of males; MM, midgut of males; HM, hindgut of males; TM, testes of males; BM, bacteriomes of males; OF, ovaries of females; BF, bacteriomes of females.

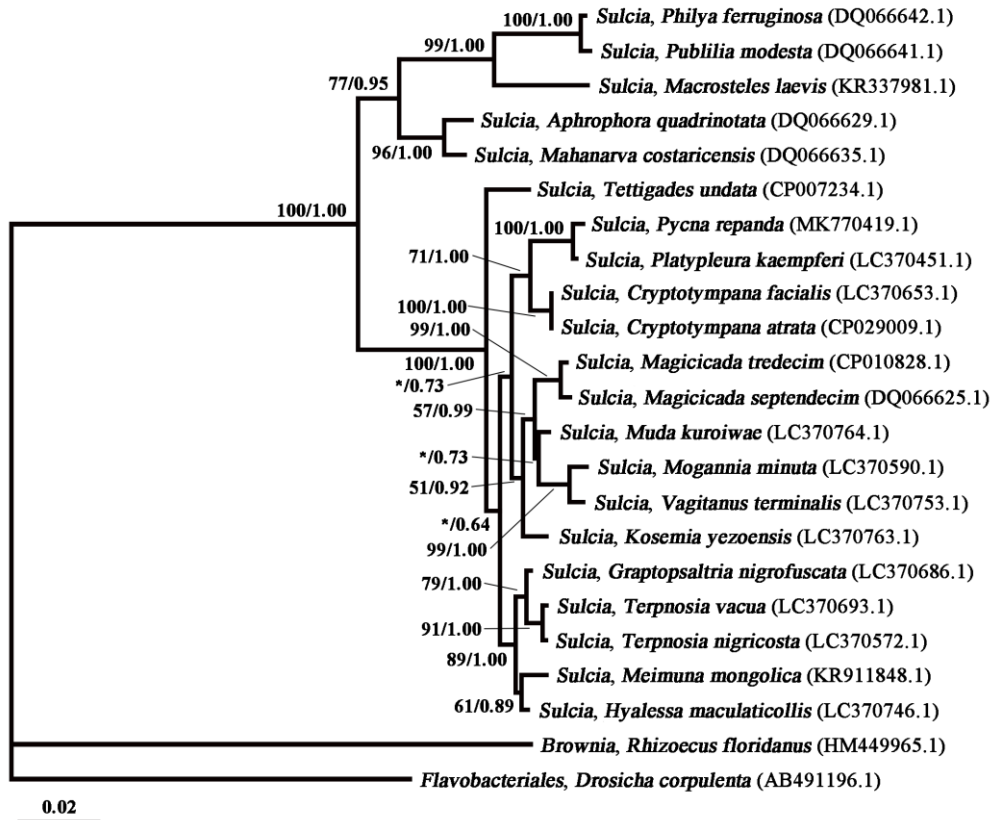

**Fig S4** Phylogenetic relationship inferred from bacterial 16S rRNA gene sequences of *Sulcia* symbionts of cicadas and other representative hemipteran insects. Asterisks representing support values less than 50% and bootstrap support values more than 50% are shown on each node in the order of the maximum-likelihood/Bayesian inference. Bootstrap support values and posterior probabilities of the maximum-likelihood/Bayesian inference are shown near branches. The scale bar represents 0.02 substitutions per nucleotide site.

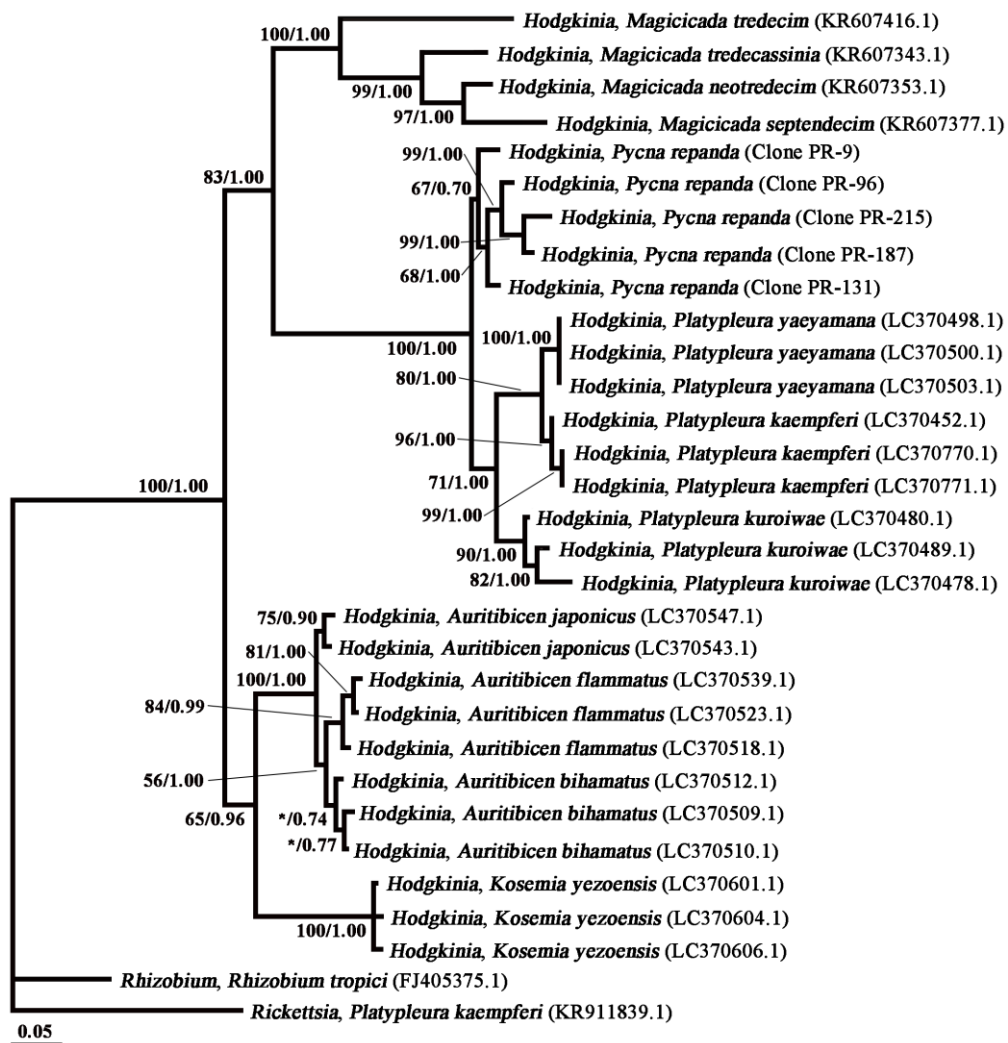

**Fig S5** Phylogenetic relationship inferred from bacterial 16S rRNA gene sequences of *Hodgkinia* symbionts of cicadas. Asterisks representing support values less than 50% and bootstrap support values more than 50% are shown on each node in the order of the maximum-likelihood/Bayesian inference. Bootstrap support values and posterior probabilities of the maximum-likelihood/Bayesian inference are shown near branches. The scale bar represents 0.05 substitutions per nucleotide site.

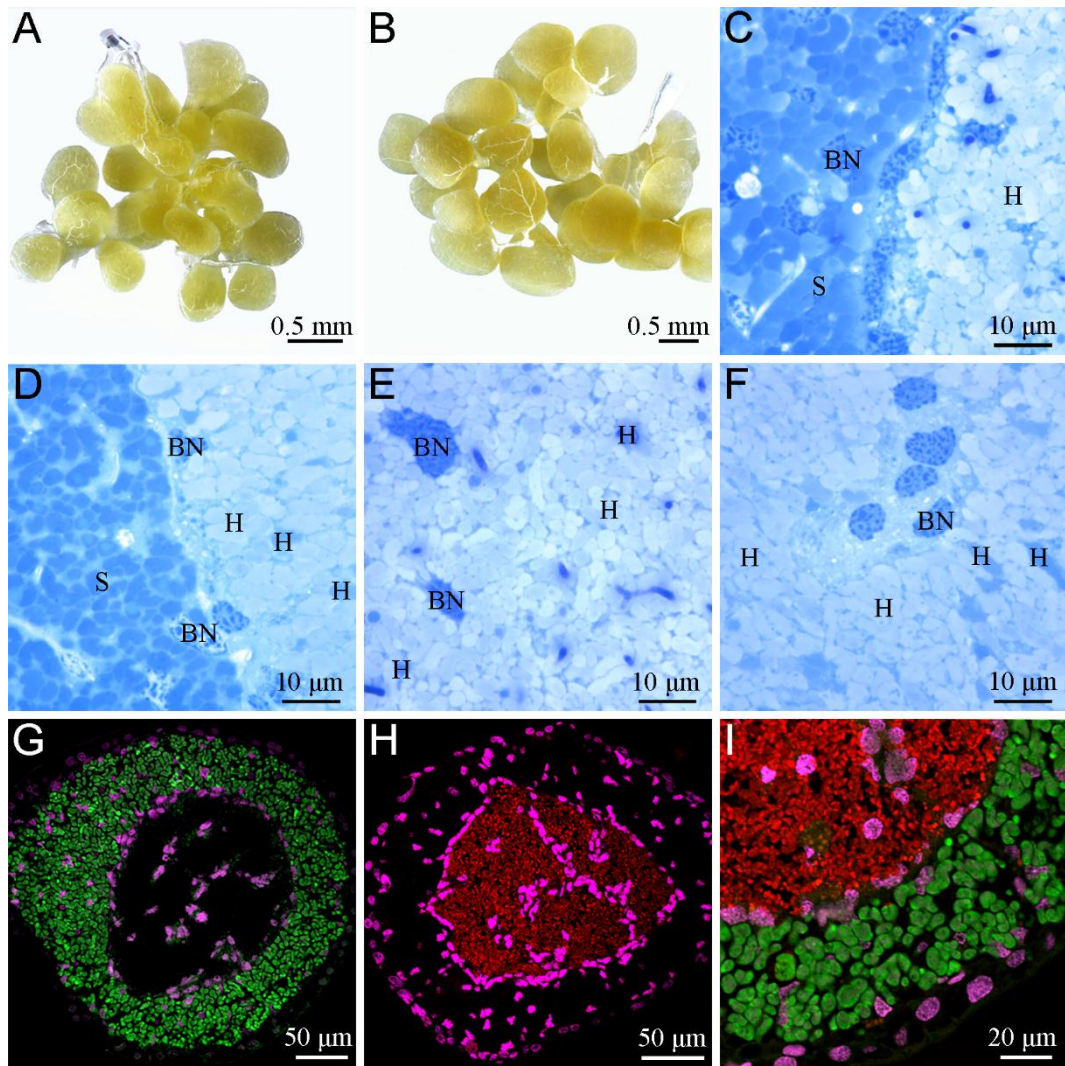

**Fig S6** General morphology of the bacteriomes and localization of primary symbionts in the bacteriome units in *Pycna repanda*. (A) General morphology of the bacteriomes of male adult. (B) General morphology of the bacteriomes of female adult. (C) The distribution of symbionts in the bacteriocytes of males. (D) The distribution of symbionts in the bacteriocytes of females. (E) The central bacteriocytes harboring *Hodgkinia* of different colors in males. (F) The central bacteriocytes harboring *Hodgkinia* of different colors in females. (G) Negative control using only *Sulcia*-specific probe (green) showing *Sulcia* hosted in the peripheral bacteriocytes. (H) Negative control using only *Hodgkinia*-specific

probe (red) showing *Hodgkinia* harbored in the central bacteriocytes. (I) FISH analysis distinguishing *Hodgkinia* (red) (in the central bacteriocytes) from *Sulcia* (green) (in the peripheral bacteriocytes). Magenta, green and red represent bacteriocyte nucleus, *Sulcia* and *Hodgkinia*, respectively. Abbreviations: BN, bacteriocyte nucleus; H, *Hodgkinia*; S, *Sulcia*.

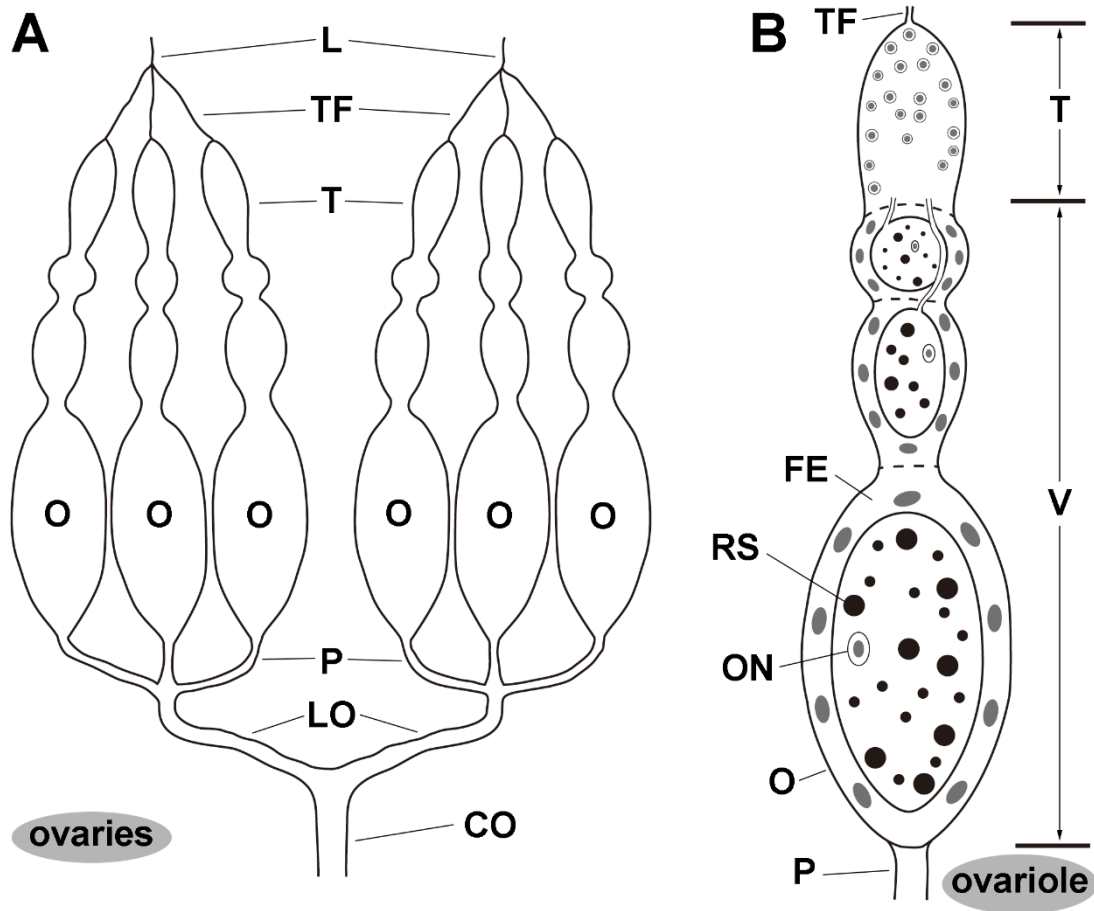

**Fig S7** Schematic representation illustrating the general morphology of ovaries and ovariole of *Pycna repanda*. (A) The general morphology of the ovaries. (B) The morphology of the ovariole. Abbreviations: CO, common oviduct; FE, follicular epithelium; L, ligament; LO, lateral oviduct; O, oocyte; ON, oocyte nucleus; P, pedicel; RS, reserve substances; TF, terminal filament; T, tropharium; V, vitellarium.



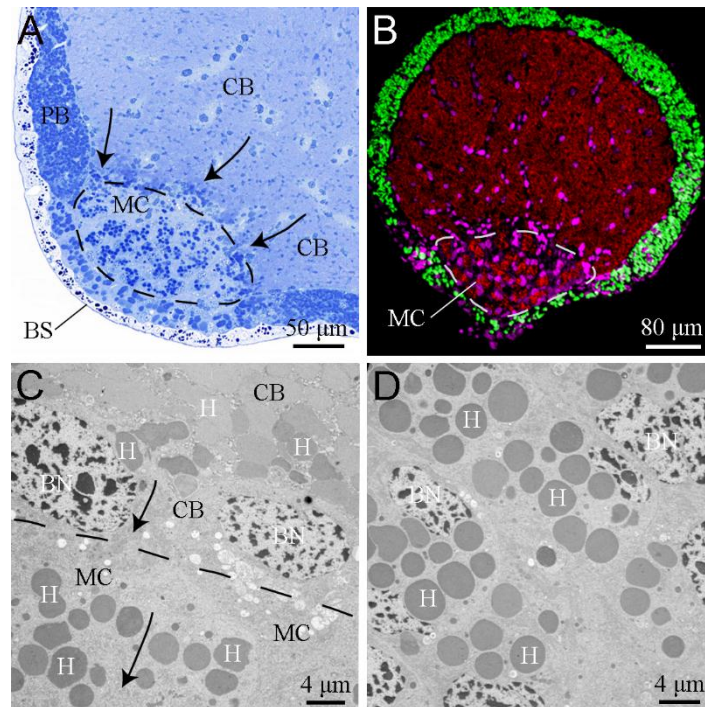

**Fig S8** *Hodgkinia* emigrating through the multi-nuclear compartment from central bacteriocyte. (A) Histological observation showing the *Hodgkinia* cells emigrating through the multi-nuclear compartment from the central bacteriocytes of females. (B) Fluorescent microscopy showing the *Hodgkinia* cells emigrating through the multi-nuclear compartment from the bacteriocytes. Magenta, green and red represent bacteriocyte nucleus, *Sulcia* and *Hodgkinia*, respectively. (C–D) Ultrastructural observation showing *Hodgkinia* cells of darker colors emigrating through the multi-nuclear compartment from central bacteriocytes. Abbreviations: BN, bacteriocyte nucleus; CB, central bacteriocyte; H, *Hodgkinia*; MC, multi-nuclear compartment (encircled with black/white dotted line); PB, peripheral bacteriocyte; black arrows, *Hodgkinia* emigrating from central bacteriocyte through the multi-nuclear compartment.

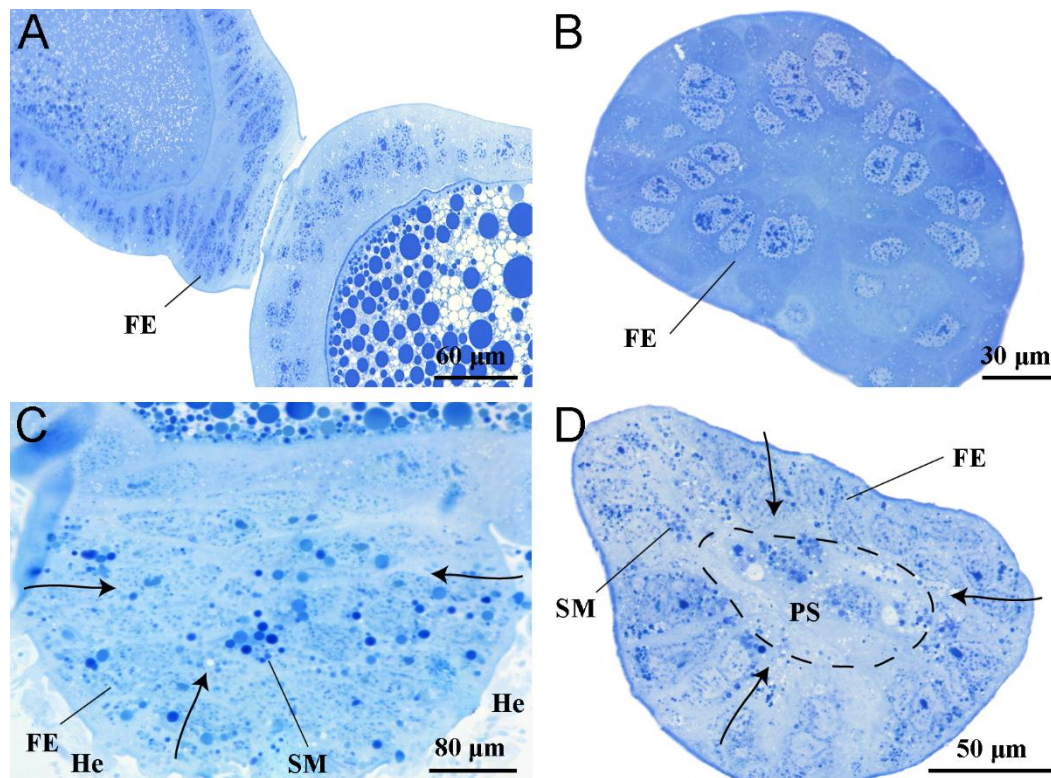

**Fig S9** Symbionts invading the follicular epithelium before migrating into the perivitelline space of the ovariole. (A–B) Follicular epithelium remained its inherent shape before invasion of symbionts (A, longitudinal section; B, cross section). (C–D) Symbionts entered the cytoplasm of the follicular epithelium, resulting in the increased volume of follicular epithelium. Abbreviations: FE, follicular epithelium; He, hemolymph; PS, perivitelline space (encircled with black dotted line); SM, symbiotic microorganisms (C, longitudinal section; D, cross section); black arrows, symbiotic microorganisms emigrating through the follicular epithelia into the perivitelline space.
